# Supplementary material for: Spreading of X chromosome inactivation via a hierarchy of defined Polycomb stations
Source: HighWire-hosted journal article supplement (doi:10.1101/gr.133751.111), 2012-09-04
Supplement: Ms94_Mthds_Leg_Tables.docx [file Ms94_Mthds_Leg_Tables.docx]

**supplemental MATERIAL**

**Spreading of X-chromosome inactivation via a hierarchy of defined Polycomb stations**

Stefan F. Pinter 1,2,3, Ruslan I. Sadreyev 1,2,3, Eda Yildirim 1,2,3, Yesu Jeon 1,2,3, Toshiro K. Ohsumi 2,3, Mark Borowsky 2,3, and Jeannie T. Lee 1,2,3,4

1 Howard Hughes Medical Institute

2 Department of Molecular Biology, Massachusetts General Hospital

3 Department of Genetics, Harvard Medical School

Boston, MA 02114

4 Corresponding author: lee@molbio.mgh.harvard.edu

**supplemental methods**

***Generation of coverage maps and enrichment segments***

To calculate coverage, fragments defined by paired reads were included, discarding duplicate fragments. The average fragment length was approximately 300-400 bp. The resulting positional coverage in each sample was normalized by the corresponding input coverage, with a pseudocount of 1: *n*norm = [(*n*+1)/(*n*­i+1)] * [*N*­i/*N*], where *n*, *n*­I, *N*, and *N*i are positional coverages in experiment and input, and total genome coverages in experiment and input, respectively.

To determine the likely regions of enrichment for chromatin modifications and EZH2, we used a window of 1 kb sliding over the chromosome length with the step of 50 bp. The significance of the window coverage at each position was assessed using the null model of randomly redistributed fragments. Specifically, each paired-end fragment at the given chromosome was assigned to a random location within this chromosome, followed by input normalization. The resulting normalized coverage of 1 Kb windows over all chromosomes was used to construct the random coverage distribution. Based on this distribution, P-value was assigned to the real window coverages. Windows with P-value below the significance cutoff were merged into segments, with up to 1 kb gap allowed between windows. The cutoff for calling significant window coverage was selected based on manual inspection of the segments produced at different cutoff values. The determined cutoffs showed high robustness between independent simulations.

Strongly covered segments for K4me3 and EZH2 were identified with the P-value cutoff of 10-5. Moderately covered segments for H3K27me3 and EZH2 were identified with absolute coverage cutoffs of 4.0 and 3.0 per position, respectively. Bivalent segments were identified in a similar fashion, with the requirement of a significant K4me3 coverage and a moderate K27me3 coverage within the same window.

Segments were classified as overlapping with K4me3 peaks, bivalent segments, and CpG islands if the corresponding feature occurred within 1 kb from the segment. CpG islands were defined by running EMBOSS 6.3.1 on unmasked genome with default parameters.

Chromosomal segments that are likely to be enriched for a chromatin modification or a DNA-binding protein were defined by merging adjacent significantly enriched 1 kb windows. The significance of the coverage enrichment in a window was determined based on the null model of originally aligned paired-end fragments being randomly shuffled across the chromosome.

***Metagene and metasite profiles***

The profiles of average coverage density over genes (metagene profiles) and over sites were constructed as described before, with the exception for a different normalization that allows for the comparison of total gene/site coverage between alleles, chromosomes, and differentiation stages. Specifically, profile densities were normalized by the number of genes/sites at a given chromosome, so that the area under the curve is not equal to 1.0 but proportional to the average gene/site coverage at this chromosome.

***Estimates of density map correlations***

Correlations between chromosomal density maps were calculated based on the coverages of non-overlapping 1-5 kb windows over the entire chromosome. For the two compared marks, Pearson correlation coefficient was calculated on the sets of window coverages, and its statistical significance was estimated using random permutation null model. Specifically, 105 simulations of random window shuffling were performed, resulting in the background distribution of Pearson correlation coefficients. This distribution was very well approximated by normal distribution (data not shown). The significance of the actual correlation of estimated as a Z-score based on the background distribution. We selected Z-score as a measure since many P-values for highly correlated marks were below computational precision and would appear as zero in the plots. Using Spearman rank correlation coefficients produced very similar results. Correlations between densities of different EZH2 and H3K27me3 sites were calculated in a similar fashion.

***Estimates of allelic skew***

Allelic skew of coverage at a given segment was analyzed by comparing allele-specific coverages at this segment. The significance of skew was estimated based on the normal distribution of effective numbers of allele-specific fragments. P-values were based on normal approximation of binomial distribution *N*(*np*, *np*(1-*p*)) where *p*=0.5 and *n* is the total effective number of fragments estimated from total coverage *cov* and average paired-end fragment length <*L*> : *n=cov*/<*L*>.

***Repeat enrichment analysis***

Among the segments enriched for EZH2, we counted the number of segments overlapping different types of repeats defined by RepeatMasker in mm9 mouse genome. The significance of repeat enrichment or depletion was estimated against the distribution of repeat numbers in the segments shuffled along the chromosome (100 simulations).

***Analysis of coverage in long-range vicinity of EZH2 sites***

The analysis of coverage trends in the megabase-scale vicinity of strong EZH2 sites was based on the coverage of 1Kb windows with 200 bp shift over the entire chromosome. For each window, the closest strong EZH2 segment was determined, and the window coverage was plotted against the distance to the closest segment. The trends of moderate site coverage around the strong sites were analyzed in a similar fashion.

***Allele-specific ChIP-qPCR***

ChIPs were carried out as described in the main text in biological triplicate for EZH2 and H3K27me3 from d0, d7 and MEF cells. Allele-specific primers were designed to discriminate at least 2 out the last 4 terminal (3’) positions of the primer annealing site, and allele-specificity was confirmed using genomic DNA from pure Cast and 129 mice. Amplification was performed using 2x iQ Sybr green (Biorad) on a CFX96 instrument (Biorad) with the following protocol: 3 min at 95C, then 45 cycles of 15 sec at 95C, 15 sec at 58C and 30 sec at 72C. Reactions using 129- and Cast-specific primers were set up in parallel from the same ChIP DNA dilution and contained one universal primer and one of two allele-specific primers (mus for 129, cas for Cast in primer name) at 250 nM:

m-13: p267-13m631musF: GGC AGG GGT TAC TAC AGT AGA GTG

p268-13m631casF: GGC AGG GGT TAC TAC AGT AGA GAA

p269-13m631R: CAG CTC TGG GAA GGT TTT GTA TG

c-13: p270-13c47F CCT GGT AGA GTC ACC TCC GGA CAG

p271-13c47musR GAA CCT TTT CCC TCC AAG CCC AGA

p272-13c47casR GAA CCT TTT CCC TCC AAG CCC CGC

c-X1: p276-Xc10F CCT GCG ATC CGG CGC TTT G

p277-Xc10musR CTC TCC CGA CCC CGC ACA CAT T

p278-Xc10casR CTC TCC CGA CCC CGC ACA CGT C

m-X1: p283-Xm269musF GGC TCA CAT TTG CAC TTT TTG CTA CG

p284-Xm269casF GGC TCA CAT TTG CAC TTT TTG CTA AA

p285-Xm269R GGG ATG AGG CGT CTG TGT TGG GTC

a-X2: p286-Xa76musF CAC ATA AAA CAT CAA ACA GAA CAT GTG AGC

p287-Xa76casF CAC ATA AAA CAT CAA ACA GAA CAT GTT AGA

p288-Xa76R GGA CAC ACA AAT AGT GAC CTG GTG GC

c-X2: p289-Xc77musF GCT TAG CGG ATT CCA TAC CCC AA

p290-Xc77casF GCT TAG CGG ATT CCA TAC CCC CC

p291-Xc77R GAG CAC ATT TTT AAG AAA ACC GAT GAC AG

m-X2: p295-Xm2240musF GGA AGG GAA GTA ATT AAG CAA ACA CAA ACA

p296-Xm2240casF GGA AGG GAA GTA ATT AAG CAA ACA CAT GG

p297-Xm2240R CTC AAA GAA AAA AAA TAT CAT AAA AAC CAA ACT GTT TC

Kdm5c:p298-intrJarid1cF CAC TTC TTT TGT GCC TTA AGC ATT AGC

p299-intrJarid1cmusR TCA CAC AGG TCA GAT ACA AAA AGT ATA GTT

p300-intrJarid1ccasR TCA CAC AGG TCA GAT ACA AAA AGT ATA GCA

**supplemental figure legends**

**Figure S1:** **X-chromosome state and allelic ratio in differentiating ESCs and MEFs.**

(A) Percentage of EZH2 and H3K27me3 immunofluorescence stained differentiating ES cells (d4, d7, d10 example images next to bar chart), Xist-RNA FISH and X-chromosome paint in MEFs, demonstrating 1:1 state of Xi:Xa.

(B) Relative abundance of input DNA aligning to specific chromosomes normalized solely by chromosome length in d0, d7 and MEFs, demonstrating expected relative abundance near 1 for all samples (not accounting for mapability). Chromosomes 13 and X highlighted by MEF labels (0.98 and 0.84, respectively).

(C) Distribution of input coverage densities over 1 kb in d0, d7 and MEFs in composite (comp), cast and 129 tracks over chr13 (black) and chrX (red), demonstrating lack of right-ward shift expected in case of aneuploidy.

**Figure S2:** **Allele-specific ChIP-seq at imprinted, biallelic and X-linked loci.**

Select ChIP-seq profiles for RNAPII-S5P, H3K4me3, H3K27me3, and EZH2 epitopes in MEFs were mapped to *Mus castaneus* (Cast) or 129 alleles. Comp, composite track (Cast + 129 + neutral). While composite tracks indicate total epitope abundance, enrichment in the allele-specific tracks is a function of both epitope abundance and SNP density. Input-normalized coverage values are indicated on the y-axis and scaled identically between alleles.

**Figure S3: Genes that escape XCI.**

(A) Classification of Chr13 and ChrX genes according to H3K4me3 status in d0, d7 and MEF. n/d, not determined due to lack of allele-specific polymorphisms. Peaks within 3 kb of an annotated TSS were scored for their allelic skew and significance (p < 0.05, norm. approx. of binomial).

(B) Genes that escape XCI are shown with aliases, ChrX coordinates, and allelic skew values ranging 100% Cast to 100% 129 for H3K4me3 ChIP DNA. Composite values (comp) indicate total H3K4me3 coverage. X-linked genes marked with H3K4me3 in MEFs were classified as escapee candidates if allelic skew was not significant (*p* > 0.05, binomial test) and/or had a maximal H3K4me3 coverage of > 3000 over a given 1kb window on the 129 allele. Escapee gene candidates predicted by RNA-seq (Yang et al., 2010) are also included in the table for comparison: 8 genes were identified in both studies (green), 4 specific to Yang et al. (2010)(yellow), and 3 specific to this study (blue).

(C) Allelic (Cast in blue, 129 in red) chromatin states of escapee gene candidates (in MEFs). Peak coverage of active mark H3K4me3 is shown on top, repressive mark H3K27me3 on the bottom (y-axis reversed to improve visualization).

**Figure S4: Comparison of strong EZH2 sites.**

(A) Distribution (as probability density function (pdf) on y-axis) of maximal EZH2 density (per 1 kb) on strong (red) and moderate (black) EZH2 sites on Chr13 and ChrX in d0, d7 and MEF cells. Two dotted threshold lines indicate the density cutoff for moderate (left) and strong EZH2 sites (right), thick lines indicate density of 1 kb windows that were above these cutoffs in moderate (black) and strong (red) EZH2 sites. Significance threshold (p < 10-5) for strong EZH2 sites was chosen such that the vast majority of moderate sites were excluded.

(B) Examples of previously identified (Ku, M et al. 2008) EZH2 targets in undifferentiated ES cells (d0) are called in our set of strong EZH2 sites (labeled in pink underneath composite EZH2 track in the middle): *Bmp6, Irx2, Ntrk2* and *Rasgrf*2. All examples are bivalent (H3K4me3 tracks on top, H3K27me3 tracks on bottom) and contain CpG islands (labeled in black, last track).

**Figure S5: Loci for validation of strong and moderate EZH2 sites.**

Screenshots of EZH2 and H3K27me3 tracks from loci chosen for validation of strong and moderate EZH2 sites on Chr13 and ChrX. Purple arrows and labels identify sites assayed by allele-specific qPCR in Figure S6 and include a strong (constant, c-13) and moderate site (m-13) on Chr13, three strong (acquired, a-X2 and constant, c-X1, c-X2) and two moderate sites (m-X1, m-X2) on ChrX.

**Figure S6: Allele-specific qPCR for validation of strong and moderate EZH2 sites.**

Input and chromatin-immunoprecipitated (ChIP) DNA from EZH2, H3K27me3 and IgG ChIPs in d0, d7 and MEF cells (three biological replicates each) was amplified with primer sets (one universal, one allele-specific primer each) to the sites shown in Figure S5. Error bars indicate standard error of Cast (blue) and 129 (red) means. A representative H3K4me3 ChIP sample was also included with error bars indicating standard error of three technical replicates. Asterisk indicates statistically significant difference (p < 0.05, one-tailed Mann-Whitney U test) to the 129 signal at negative control locus in the gene body of escapee gene *Kdm5c*.

**Figure S7: Strong and moderate EZH2 site at the *Xic*-distant site, *Mamld1*.**

Screenshot of EZH2, H3K27me3, and H3K4me3 tracks in d0 and d7 cells at *Mamld1*, approximately 30 Mb from the *Xic*. As in Figure 5, strong (constant and acquired) and moderate EZH2 sites are indicated underneath the composite (comp) EZH2 tracks, SNP (and Indel) density per 1 kb window above the epitope tracks.

**supplementary Tables**

**Table S-I:**  **Statistics for sequencing of input and indicated epitopes.**

ChIP-seq results for MEF, d0, and d7 ES cells showing all clusters and reads that are aligned, repetitive or unique, and allelic or neutral in millions and percent.

| celltype | epitope | clusters | aligned | | unique | | allelic | | neutral | |
| --- | --- | --- | --- | --- | --- | --- | --- | --- | --- | --- |
| MEF | input 1 | 19.5 | 18.6 | 95% | 15.5 | 83% | 5.6 | 36% | 9.9 | 64% |
| MEF | input 2 | 28.7 | 27.5 | 96% | 23.1 | 84% | 8.5 | 37% | 14.6 | 63% |
| MEF | H3K27me3 | 17.9 | 17.0 | 95% | 15.2 | 89% | 5.5 | 36% | 9.7 | 64% |
| MEF | EZH2 | 21.9 | 19.8 | 90% | 16.8 | 85% | 6.1 | 36% | 10.7 | 64% |
| MEF | H3K4me3 | 20.4 | 19.4 | 95% | 17.9 | 93% | 5.5 | 31% | 12.5 | 69% |
| MEF | H3K36me3 | 17.2 | 16.5 | 96% | 14.4 | 87% | 5.1 | 36% | 9.2 | 64% |
| MEF | POL-II-S5 | 26.0 | 24.3 | 93% | 21.6 | 89% | 7.6 | 35% | 14.0 | 65% |
| ES d0 | input 1 | 32.5 | 31.3 | 96% | 26.0 | 83% | 9.5 | 36% | 16.5 | 64% |
| ES d0 | input 2 | 23.0 | 21.1 | 92% | 18.3 | 87% | 6.9 | 38% | 11.4 | 62% |
| ES d0 | H3K27me3 | 27.1 | 25.8 | 95% | 22.5 | 87% | 8.1 | 36% | 14.3 | 64% |
| ES d0 | EZH2 | 27.7 | 26.1 | 94% | 21.9 | 84% | 7.8 | 35% | 14.2 | 65% |
| ES d0 | H3K4me3 | 25.6 | 23.9 | 93% | 20.6 | 86% | 6.5 | 31% | 14.2 | 69% |
| ES d0 | H3K36me3 | 24.3 | 23.1 | 95% | 18.9 | 82% | 6.6 | 35% | 12.3 | 65% |
| ES d0 | POL-II-S5 | 29.3 | 27.9 | 95% | 24.4 | 88% | 8.5 | 35% | 16.0 | 65% |
| ES d7 | input | 29.7 | 28.6 | 96% | 23.7 | 83% | 8.4 | 35% | 15.3 | 65% |
| ES d7 | H3K27me3 | 30.6 | 28.8 | 94% | 25.3 | 88% | 8.6 | 34% | 16.7 | 66% |
| ES d7 | EZH2 | 29.1 | 27.5 | 94% | 23.0 | 84% | 8.2 | 36% | 14.8 | 64% |
| ES d7 | H3K4me3 | 26.2 | 24.8 | 95% | 22.7 | 92% | 7.1 | 31% | 15.6 | 69% |
| ES d7 | H3K36me3 | 29.5 | 28.2 | 96% | 21.6 | 77% | 6.8 | 32% | 14.8 | 68% |
| ES d7 | POL-II-S5 | 28.4 | 26.7 | 94% | 22.6 | 85% | 8.1 | 36% | 14.6 | 64% |
|  |  |  |  |  |  |  |  |  |  |  |
|  | Average | 25.7 | 24.3 | 94.5% | 20.8 | 85.7% | 7.2 | 34.9% | 13.6 | 65.1% |
|  | Stdev | 4.4 | 4.3 | 1.5% | 3.5 | 3.6% | 1.3 | 2.1% | 2.3 | 2.1% |

**Table S-II: Enriched and depleted repeat classes at EZH2 sites**

Repeat classes significantly enriched or depleted at strong, strong-flanking (+/- 3 kb) and moderate sites on d0, d7 and MEF are listed with odds ratios (inverted negative for depleted classes) and percentage of EZH2 sites containing (in case of enriched) or lacking (in case of depleted) a given repeat class. Only significantly enriched or depleted (Z ≥ 2.5) classes are listed with percentage, all others (Z < 2.5) are set to 0.0%.

| **chr13-strong** | d0 odds ratio | % d0 sites | d7 odds ratio | % of d7 sites | MEF odds ratio | % of MEF sites |
| --- | --- | --- | --- | --- | --- | --- |
| Non-repeat | 1.8 | 0.0 | 3.4 | 17.3 | 1.8 | 0.0 |
| DNA transposon | -5.0 | 94.9 | -5.3 | 95.1 | -3.1 | 0.0 |
| LINE | -17.4 | 92.4 | -17.5 | 90.1 | -14.2 | 90.4 |
| LTR | -28.3 | 94.9 | -16.6 | 90.1 | -15.1 | 91.6 |
| Low_complexity | 2.6 | 60.8 | 2.1 | 51.9 | 2.1 | 56.6 |
| Others | -2.2 | 0.0 | -8.9 | 0.0 | -1.6 | 0.0 |
| SINE | -5.1 | 75.9 | -3.9 | 74.1 | -2.3 | 62.7 |
| Simple_repeat | 1.2 | 0.0 | 1.2 | 0.0 | 1.1 | 0.0 |

| **chrX-strong** | d0 odds ratio | % d0 sites | d7 odds ratio | % of d7 sites | MEF odds ratio | % of MEF sites |
| --- | --- | --- | --- | --- | --- | --- |
| Non-repeat | 5.5 | 23.2 | 2.7 | 12.9 | 3.1 | 14.0 |
| DNA transposon | -4.4 | 0.0 | -1.8 | 3.0 | -68.6 | 0.0 |
| LINE | -15.9 | 92.9 | -5.5 | 78.9 | -16.4 | 90.0 |
| LTR | -13.8 | 94.6 | -8.2 | 91.2 | -38.3 | 98.0 |
| Low_complexity | 1.7 | 46.4 | 1.7 | 39.5 | 2.1 | 52.0 |
| Others | -45.4 | 0.0 | -2.8 | 3.0 | -34.6 | 0.0 |
| SINE | -4.1 | 78.6 | -1.7 | 58.5 | -4.0 | 82.0 |
| Simple_repeat | 1.4 | 0.0 | 1.6 | 64.6 | 1.6 | 58.0 |

| **chr13-flanking** | d0 odds ratio | % d0 sites | d7 odds ratio | % of d7 sites | MEF odds ratio | % of MEF sites |
| --- | --- | --- | --- | --- | --- | --- |
| Non-repeat | -2.0 | 0.0 | 1.3 | 0.0 | -1.6 | 0.0 |
| DNA transposon | -1.5 | 0.0 | -1.5 | 0.0 | 1.1 | 0.0 |
| LINE | -3.5 | 59.5 | -2.4 | 50.6 | -2.4 | 47.0 |
| LTR | -3.4 | 59.5 | -2.0 | 46.9 | -2.2 | 53.0 |
| Low_complexity | 1.5 | 68.4 | 1.6 | 69.1 | 1.2 | 0.0 |
| Others | -1.0 | 0.0 | -2.8 | 0.0 | 1.2 | 0.0 |
| SINE | -1.1 | 0.0 | 1.2 | 0.0 | 1.2 | 0.0 |
| Simple_repeat | 1.4 | 92.4 | 1.4 | 96.3 | 1.4 | 95.2 |

| **chrX-flanking** | d0 odds ratio | % d0 sites | d7 odds ratio | % of d7 sites | MEF odds ratio | % of MEF sites |
| --- | --- | --- | --- | --- | --- | --- |
| Non-repeat | -1.0 | 0.0 | -1.8 | 0.0 | 1.8 | 0.0 |
| DNA transposon | -1.0 | 0.0 | 1.4 | 0.0 | -1.2 | 0.0 |
| LINE | -3.9 | 57.1 | -2.1 | 28.6 | -3.9 | 54.0 |
| LTR | -3.4 | 67.9 | -2.2 | 55.1 | -2.9 | 60.0 |
| Low_complexity | 1.4 | 0.0 | 1.3 | 60.5 | 1.4 | 0.0 |
| Others | -1.5 | 0.0 | -1.1 | 0.0 | -1.4 | 0.0 |
| SINE | 1.2 | 0.0 | 1.7 | 90.5 | 1.3 | 0.0 |
| Simple_repeat | 1.6 | 100.0 | 1.5 | 91.8 | 1.5 | 92.0 |

| **chr13-moderate** | d0 odds ratio | % d0 sites | d7 odds ratio | % of d7 sites | MEF odds ratio | % of MEF sites |
| --- | --- | --- | --- | --- | --- | --- |
| Non-repeat | -1.2 | 0.0 | -1.1 | 0.0 | -1.1 | 0.0 |
| DNA transposon | -1.1 | 0.0 | -1.3 | 0.0 | 1.1 | 0.0 |
| LINE | -1.2 | 56.7 | -1.6 | 65.5 | -1.6 | 64.6 |
| LTR | -1.4 | 65.4 | -1.5 | 67.2 | -1.6 | 71.4 |
| Low_complexity | 1.4 | 26.0 | 1.4 | 24.7 | 1.6 | 28.5 |
| Others | -1.2 | 0.0 | -1.4 | 0.0 | -1.3 | 0.0 |
| SINE | -1.1 | 0.0 | -1.0 | 0.0 | -1.1 | 0.0 |
| Simple_repeat | 1.1 | 51.6 | 1.2 | 51.7 | 1.3 | 52.9 |

| **chrX-moderate** | d0 odds ratio | % d0 sites | d7 odds ratio | % of d7 sites | MEF odds ratio | % of MEF sites |
| --- | --- | --- | --- | --- | --- | --- |
| Non-repeat | -1.4 | 96.4 | -1.3 | 95.8 | -1.2 | 0.0 |
| DNA transposon | -1.1 | 0.0 | 1.3 | 11.4 | 1.2 | 0.0 |
| LINE | -1.1 | 36.1 | -1.2 | 40.5 | -1.1 | 38.9 |
| LTR | -1.2 | 65.5 | -1.2 | 64.4 | -1.3 | 68.0 |
| Low_complexity | 1.4 | 26.4 | 1.2 | 22.4 | 1.5 | 23.1 |
| Others | -1.5 | 0.0 | -1.3 | 0.0 | -1.3 | 0.0 |
| SINE | -1.0 | 0.0 | 1.4 | 55.7 | 1.1 | 45.3 |
| Simple_repeat | 1.2 | 44.4 | 1.3 | 46.2 | 1.2 | 40.8 |

**Table S-III: Enriched and depleted repeat types at EZH2 sites**

Repeat types significantly enriched or depleted at strong, strong-flanking (+/- 3 kb) and moderate sites on d0, d7 and MEF are listed with odds ratios (inverted negative for depleted classes) and percentage of EZH2 sites containing (in case of enriched) or lacking (in case of depleted) a given repeat class. Only significantly enriched or depleted (Z ≥ 2.5) classes are listed with percentage, all others (Z < 2.5) are set to 0.0%.

| **chr13-strong** | Type | d0 odds ratio | % d0 sites | d7 odds ratio | % of d7 sites | MEF odds ratio | % of MEF sites |
| --- | --- | --- | --- | --- | --- | --- | --- |
| non-Repeat | . | 1.8 | 0.0 | 3.4 | 17.3 | 1.8 | 0.0 |
| L1Md_F2 | LINE | -90.1 | 100.0 | -109.7 | 100.0 | -82.2 | 0.0 |
| Lx8 | LINE | -83.2 | 0.0 | -10.3 | 0.0 | -6.6 | 0.0 |
| C-rich | Low_complexity | 12.3 | 12.7 | 10.4 | 13.6 | 8.2 | 6.0 |
| GA-rich | Low_complexity | 2.8 | 16.5 | 2.6 | 17.3 | 1.9 | 0.0 |
| GC-rich | Low_complexity | 36.3 | 29.1 | 27.9 | 28.4 | 42.8 | 33.7 |
| G-rich | Low_complexity | 8.9 | 8.9 | 10.9 | 11.1 | 3.1 | 0.0 |
| T-rich | Low_complexity | 3.7 | 7.6 | 2.5 | 0.0 | 1.1 | 0.0 |
| B3 | SINE | -12.8 | 98.7 | -9.5 | 97.5 | -6.0 | 97.6 |
| B4A | SINE | -126.1 | 100.0 | -165.0 | 100.0 | -10.9 | 98.8 |
| RSINE1 | SINE | -122.5 | 100.0 | -5.4 | 97.5 | -112.8 | 100.0 |
| (A)n | Simple_repeat | 2.7 | 10.1 | 1.8 | 0.0 | 2.2 | 0.0 |
| (CCG)n | Simple_repeat | 18.6 | 5.1 | 25.5 | 6.2 | 22.8 | 4.8 |
| (CGG)n | Simple_repeat | 18.2 | 3.8 | 13.5 | 3.7 | 16.2 | 2.4 |
| (CGGGG)n | Simple_repeat | 7.3 | 1.3 | 6.9 | 1.2 | 8.5 | 1.2 |
| (GA)n | Simple_repeat | 2.0 | 13.9 | 1.8 | 12.3 | 1.3 | 0.0 |
| (TA)n | Simple_repeat | -2.5 | 0.0 | -2.4 | 0.0 | -3.5 | 0.0 |
| (TC)n | Simple_repeat | 1.6 | 0.0 | 1.1 | 0.0 | -1.5 | 0.0 |
| (TG)n | Simple_repeat | -1.3 | 0.0 | -1.1 | 0.0 | 1.1 | 0.0 |

| **chrX-strong** | Type | d0 odds ratio | % d0 sites | d7 odds ratio | % of d7 sites | MEF odds ratio | % of MEF sites |
| --- | --- | --- | --- | --- | --- | --- | --- |
| non-Repeat | . | 5.5 | 23.2 | 2.7 | 12.9 | 3.1 | 14.0 |
| L1Md_F2 | LINE | -113.1 | 100.0 | -7.0 | 98.0 | -8.2 | 0.0 |
| Lx8 | LINE | -63.1 | 0.0 | -7.4 | 99.3 | -4.3 | 0.0 |
| C-rich | Low_complexity | 23.2 | 8.9 | 23.1 | 7.5 | 22.2 | 10.0 |
| GA-rich | Low_complexity | 2.7 | 0.0 | 2.3 | 5.4 | 2.8 | 0.0 |
| GC-rich | Low_complexity | 43.5 | 23.2 | 53.9 | 17.0 | 46.8 | 22.0 |
| G-rich | Low_complexity | 5.8 | 1.8 | 5.7 | 1.4 | 7.3 | 2.0 |
| T-rich | Low_complexity | -1.2 | 0.0 | -1.4 | 0.0 | 1.2 | 0.0 |
| B3 | SINE | -3.7 | 0.0 | -2.0 | 0.0 | -1.9 | 0.0 |
| B4A | SINE | -43.0 | 0.0 | -9.7 | 99.3 | -2.9 | 0.0 |
| RSINE1 | SINE | -5.2 | 0.0 | -2.8 | 0.0 | -3.8 | 0.0 |
| (A)n | Simple_repeat | 2.9 | 0.0 | 1.4 | 0.0 | 3.0 | 0.0 |
| (CCG)n | Simple_repeat | 17.5 | 3.6 | 57.6 | 6.8 | 54.6 | 14.0 |
| (CGG)n | Simple_repeat | 25.8 | 3.6 | 72.1 | 5.4 | 73.6 | 12.0 |
| (CGGGG)n | Simple_repeat | 9.2 | 1.8 | 40.7 | 3.4 | 10.0 | 2.0 |
| (GA)n | Simple_repeat | 2.6 | 10.7 | 2.3 | 8.8 | 1.5 | 0.0 |
| (TA)n | Simple_repeat | -4.6 | 0.0 | -11.4 | 99.3 | -36.1 | 0.0 |
| (TC)n | Simple_repeat | 1.7 | 0.0 | 2.4 | 10.9 | -2.0 | 0.0 |
| (TG)n | Simple_repeat | 1.2 | 0.0 | 1.7 | 15.0 | 1.1 | 0.0 |

| **chr13-flanking** | Type | d0 odds ratio | % d0 sites | d7 odds ratio | % of d7 sites | MEF odds ratio | % of MEF sites |
| --- | --- | --- | --- | --- | --- | --- | --- |
| L1_Mm | LINE | -36.1 | 0.0 | -3.3 | 0.0 | -3.4 | 0.0 |
| L1_Mus1 | LINE | -2.8 | 0.0 | -1.5 | 0.0 | -5.6 | 0.0 |
| L1MB5 | LINE | 4.6 | 0.0 | 5.7 | 1.2 | 5.7 | 2.4 |
| L1Md_A | LINE | -1.9 | 0.0 | -40.4 | 0.0 | -3.7 | 0.0 |
| L1Md_F2 | LINE | -140.2 | 100.0 | -6.9 | 98.8 | -13.5 | 98.8 |
| L1Md_T | LINE | -5.9 | 0.0 | -66.7 | 100.0 | -3.3 | 0.0 |
| L1MEf | LINE | -9.5 | 0.0 | -9.8 | 0.0 | -9.9 | 0.0 |
| C-rich | Low_complexity | 4.0 | 6.3 | 3.1 | 4.9 | 1.5 | 0.0 |
| CT-rich | Low_complexity | 1.6 | 0.0 | 1.7 | 0.0 | 1.3 | 0.0 |
| GA-rich | Low_complexity | -1.1 | 0.0 | -1.0 | 0.0 | 1.1 | 0.0 |
| GC-rich | Low_complexity | 9.7 | 12.7 | 6.0 | 8.6 | -1.1 | 0.0 |
| B1_Mur1 | SINE | 1.5 | 0.0 | 2.3 | 12.3 | 1.0 | 0.0 |
| B1_Mur3 | SINE | 1.4 | 0.0 | 2.7 | 9.9 | 1.3 | 0.0 |
| B1F | SINE | -2.0 | 0.0 | -1.0 | 0.0 | 1.1 | 0.0 |
| B1F1 | SINE | -3.2 | 0.0 | -3.2 | 0.0 | 1.1 | 0.0 |
| B2_Mm1a | SINE | 1.1 | 0.0 | 1.4 | 0.0 | 2.8 | 8.4 |
| ID_B1 | SINE | 1.7 | 0.0 | 1.6 | 0.0 | 1.3 | 0.0 |
| ID4 | SINE | 1.8 | 0.0 | -1.1 | 0.0 | 1.7 | 0.0 |
| MIR | SINE | 1.7 | 0.0 | 2.5 | 16.0 | 2.5 | 14.5 |
| MIRb | SINE | 2.0 | 13.9 | 2.7 | 16.0 | 2.1 | 14.5 |
| MIRc | SINE | 4.0 | 12.7 | 1.8 | 0.0 | 4.2 | 14.5 |
| PB1 | SINE | 1.7 | 0.0 | 1.2 | 0.0 | -1.2 | 0.0 |
| PB1D10 | SINE | 1.2 | 0.0 | 1.6 | 0.0 | 1.1 | 0.0 |
| RSINE1 | SINE | -1.7 | 0.0 | -1.7 | 0.0 | 1.0 | 0.0 |
| (CA)n | Simple_repeat | 1.7 | 41.8 | 1.4 | 0.0 | 1.6 | 47.0 |
| (CAGAGA)n | Simple_repeat | 1.8 | 0.0 | 1.7 | 0.0 | 3.3 | 4.8 |
| (CCA)n | Simple_repeat | 2.5 | 0.0 | 3.7 | 3.7 | 6.1 | 6.0 |
| (CCG)n | Simple_repeat | 12.4 | 1.3 | 4.4 | 0.0 | -2.5 | 0.0 |
| (GGA)n | Simple_repeat | 3.2 | 5.1 | 1.6 | 0.0 | 2.3 | 0.0 |
| (T)n | Simple_repeat | 2.7 | 15.2 | 1.9 | 0.0 | 2.4 | 14.5 |
| (TCTG)n | Simple_repeat | 2.3 | 0.0 | 2.8 | 6.2 | 3.3 | 6.0 |
| (TG)n | Simple_repeat | 1.3 | 0.0 | 1.5 | 42.0 | 1.2 | 0.0 |
| (TTTTG)n | Simple_repeat | 1.6 | 0.0 | 2.2 | 0.0 | 1.6 | 0.0 |

| **chrX-flanking** | Type | d0 odds ratio | % d0 sites | d7 odds ratio | % of d7 sites | MEF odds ratio | % of MEF sites |
| --- | --- | --- | --- | --- | --- | --- | --- |
| L1_Mm | LINE | -48.1 | 0.0 | -129.4 | 100.0 | -41.9 | 0.0 |
| L1_Mus1 | LINE | -2.3 | 0.0 | -4.0 | 96.6 | -2.7 | 0.0 |
| L1MB5 | LINE | 1.5 | 0.0 | 5.7 | 2.7 | 1.6 | 0.0 |
| L1Md_A | LINE | -61.2 | 0.0 | -161.6 | 100.0 | -54.5 | 0.0 |
| L1Md_F2 | LINE | -3.8 | 92.9 | -3.7 | 91.2 | -2.3 | 0.0 |
| L1Md_T | LINE | -7.8 | 0.0 | -7.1 | 98.0 | -3.7 | 0.0 |
| L1MEf | LINE | 3.6 | 0.0 | 4.5 | 1.4 | -4.9 | 0.0 |
| C-rich | Low_complexity | 5.1 | 3.6 | 11.8 | 6.1 | 13.8 | 8.0 |
| CT-rich | Low_complexity | 2.0 | 0.0 | 1.9 | 10.9 | 2.3 | 0.0 |
| GA-rich | Low_complexity | 1.3 | 0.0 | 2.5 | 10.9 | 2.2 | 0.0 |
| GC-rich | Low_complexity | 23.5 | 12.5 | 7.7 | 5.4 | 9.1 | 6.0 |
| B1_Mur1 | SINE | 1.3 | 0.0 | 2.1 | 11.6 | 1.7 | 0.0 |
| B1_Mur3 | SINE | -23.7 | 0.0 | 2.3 | 7.5 | 1.5 | 0.0 |
| B1F | SINE | -1.1 | 0.0 | 2.1 | 18.4 | 2.0 | 0.0 |
| B1F1 | SINE | 1.5 | 0.0 | 2.3 | 8.8 | 1.3 | 0.0 |
| B2_Mm1a | SINE | -1.2 | 0.0 | 1.8 | 0.0 | 2.7 | 0.0 |
| ID_B1 | SINE | -1.0 | 0.0 | 2.0 | 25.9 | 2.1 | 24.0 |
| ID4 | SINE | -1.5 | 0.0 | 2.3 | 12.2 | 2.5 | 12.0 |
| MIR | SINE | 1.8 | 0.0 | 2.0 | 16.3 | 2.3 | 20.0 |
| MIRb | SINE | 2.2 | 17.9 | 2.5 | 21.1 | 1.7 | 0.0 |
| MIRc | SINE | 3.1 | 10.7 | 3.1 | 10.9 | 2.1 | 0.0 |
| PB1 | SINE | 2.7 | 0.0 | 3.0 | 8.8 | 3.5 | 10.0 |
| PB1D10 | SINE | 2.1 | 19.6 | 2.0 | 21.1 | 1.2 | 0.0 |
| RSINE1 | SINE | 1.7 | 0.0 | 1.7 | 24.5 | 1.1 | 0.0 |
| (CA)n | Simple_repeat | 1.3 | 0.0 | 1.1 | 0.0 | 1.0 | 0.0 |
| (CAGAGA)n | Simple_repeat | -10.4 | 0.0 | 8.9 | 2.7 | -9.6 | 0.0 |
| (CCA)n | Simple_repeat | 3.6 | 0.0 | 4.7 | 4.1 | -5.5 | 0.0 |
| (CCG)n | Simple_repeat | 29.0 | 8.9 | 6.0 | 1.4 | 11.7 | 2.0 |
| (GGA)n | Simple_repeat | 3.4 | 0.0 | 5.1 | 4.1 | 2.0 | 0.0 |
| (T)n | Simple_repeat | 2.1 | 0.0 | 1.2 | 0.0 | 2.4 | 0.0 |
| (TCTG)n | Simple_repeat | -6.1 | 0.0 | 2.4 | 0.0 | 1.9 | 0.0 |
| (TG)n | Simple_repeat | 2.5 | 51.8 | 1.6 | 34.0 | 2.3 | 44.0 |
| (TTTTG)n | Simple_repeat | -2.2 | 0.0 | 2.2 | 8.2 | 3.2 | 12.0 |

| **chr13-moderate** | Type | d0 odds ratio | % d0 sites | d7 odds ratio | % of d7 sites | MEF odds ratio | % of MEF sites |
| --- | --- | --- | --- | --- | --- | --- | --- |
| non-Repeat | . | -1.2 | 0.0 | -1.1 | 0.0 | -1.1 | 0.0 |
| MER5B | DNA | 1.5 | 0.0 | 1.1 | 0.0 | 1.0 | 0.0 |
| Tigger5 | DNA | 1.1 | 0.0 | 1.5 | 0.0 | -36.4 | 0.0 |
| HAL1-3A_ME | LINE | -2.4 | 0.0 | -1.2 | 0.0 | -1.3 | 0.0 |
| L1_Mm | LINE | 1.1 | 0.0 | -2.2 | 0.0 | -3.6 | 0.0 |
| L1_Mur1 | LINE | -1.6 | 0.0 | -2.4 | 0.0 | -3.3 | 0.0 |
| L1_Mur2 | LINE | -2.3 | 0.0 | -1.7 | 0.0 | -1.3 | 0.0 |
| L1_Mur3 | LINE | -1.0 | 0.0 | -1.6 | 0.0 | -1.9 | 0.0 |
| L1_Mus3 | LINE | -1.8 | 0.0 | -2.1 | 98.9 | -1.1 | 0.0 |
| L1MC1 | LINE | 1.1 | 0.0 | -1.4 | 0.0 | 1.5 | 0.0 |
| L1Md_A | LINE | -1.8 | 0.0 | -6.9 | 99.7 | -6.8 | 99.7 |
| L1Md_F | LINE | -1.3 | 0.0 | -1.6 | 0.0 | -45.5 | 0.0 |
| L1Md_F2 | LINE | 1.1 | 0.0 | -2.1 | 97.0 | -2.6 | 97.8 |
| L1Md_T | LINE | -1.4 | 0.0 | -4.8 | 99.3 | -4.6 | 99.3 |
| L1MD1 | LINE | -2.6 | 0.0 | 1.2 | 0.0 | -17.0 | 0.0 |
| L1ME4a | LINE | 3.5 | 0.3 | 2.3 | 0.0 | 1.1 | 0.0 |
| L1VL1 | LINE | 1.1 | 0.0 | -28.2 | 0.0 | 1.1 | 0.0 |
| L1VL2 | LINE | 1.4 | 0.0 | -1.2 | 0.0 | -2.9 | 0.0 |
| L1VL4 | LINE | -2.5 | 0.0 | -1.7 | 0.0 | -2.3 | 0.0 |
| L2a | LINE | 1.1 | 0.0 | -1.2 | 0.0 | -1.8 | 0.0 |
| L2b | LINE | 1.3 | 0.0 | 1.4 | 0.0 | 1.1 | 0.0 |
| AT_rich | Low_complexity | 1.0 | 0.0 | 1.0 | 0.0 | 1.1 | 0.0 |
| C-rich | Low_complexity | 3.6 | 1.6 | 4.2 | 1.8 | 3.2 | 1.3 |
| CT-rich | Low_complexity | 1.2 | 0.0 | 1.4 | 0.0 | 1.2 | 0.0 |
| G-rich | Low_complexity | 2.6 | 1.1 | 2.8 | 1.2 | 2.1 | 0.0 |
| GA-rich | Low_complexity | 1.3 | 0.0 | 1.1 | 0.0 | 1.9 | 5.7 |
| GC-rich | Low_complexity | 9.9 | 3.9 | 12.9 | 4.6 | 17.4 | 5.9 |
| polypyrimidine | Low_complexity | 1.6 | 0.0 | 1.4 | 0.0 | 1.7 | 0.0 |
| T-rich | Low_complexity | 1.5 | 0.0 | 1.4 | 0.0 | 2.3 | 2.2 |
| ETnERV2-int | LTR | -7.1 | 0.0 | -1.6 | 0.0 | -42.3 | 0.0 |
| ETnERV3-int | LTR | -16.5 | 0.0 | -14.4 | 0.0 | -9.2 | 0.0 |
| IAPEz-int | LTR | -1.7 | 0.0 | -6.1 | 0.0 | -8.0 | 0.0 |
| MER89 | LTR | 1.6 | 0.0 | -12.2 | 0.0 | -8.4 | 0.0 |
| MMETn-int | LTR | -41.0 | 0.0 | -3.6 | 0.0 | -24.9 | 0.0 |
| MTB_Mm-int | LTR | -1.0 | 0.0 | -9.3 | 0.0 | -6.4 | 0.0 |
| RLTR16 | LTR | 1.2 | 0.0 | -31.1 | 0.0 | 1.7 | 0.0 |
| RLTR26 | LTR | -1.0 | 0.0 | 1.9 | 0.0 | -1.0 | 0.0 |
| RMER21B | LTR | 1.3 | 0.0 | -1.2 | 0.0 | 1.5 | 0.0 |
| RMER1C | Other | -1.1 | 0.0 | -1.8 | 0.0 | -2.2 | 0.0 |
| 5S | rRNA | 2.1 | 0.0 | -9.1 | 0.0 | -5.8 | 0.0 |
| (A)n | Simple_repeat | 1.5 | 0.0 | 1.9 | 4.1 | 1.6 | 0.0 |
| (ATG)n | Simple_repeat | -2.1 | 0.0 | 1.6 | 0.0 | -13.6 | 0.0 |
| (CA)n | Simple_repeat | 1.1 | 0.0 | 1.2 | 0.0 | 1.2 | 0.0 |
| (CACCC)n | Simple_repeat | 1.8 | 0.0 | 1.1 | 0.0 | 1.4 | 0.0 |
| (CAG)n | Simple_repeat | 1.6 | 0.0 | 2.2 | 0.0 | -1.1 | 0.0 |
| (CAT)n | Simple_repeat | -1.5 | 0.0 | 1.2 | 0.0 | -1.6 | 0.0 |
| (CCA)n | Simple_repeat | 1.3 | 0.0 | 2.0 | 0.0 | 2.5 | 0.0 |
| (CCAA)n | Simple_repeat | -1.3 | 0.0 | 1.0 | 0.0 | 1.4 | 0.0 |
| (CCCCCA)n | Simple_repeat | 3.1 | 0.6 | 1.6 | 0.0 | 3.3 | 0.0 |
| (CCCCCT)n | Simple_repeat | 2.8 | 0.0 | 3.4 | 0.3 | 3.6 | 0.0 |
| (CCCCG)n | Simple_repeat | 11.0 | 0.7 | 8.5 | 0.6 | 12.4 | 0.8 |
| (CCG)n | Simple_repeat | 12.1 | 0.9 | 13.7 | 1.0 | 22.4 | 1.2 |
| (CG)n | Simple_repeat | 5.9 | 0.3 | 6.0 | 0.4 | 5.4 | 0.3 |
| (CGG)n | Simple_repeat | 5.1 | 0.3 | 8.0 | 0.5 | 10.8 | 0.5 |
| (CGGGG)n | Simple_repeat | 9.5 | 0.3 | 11.4 | 0.4 | 7.5 | 0.3 |
| (CGTG)n | Simple_repeat | -1.0 | 0.0 | 2.3 | 0.0 | 1.6 | 0.0 |
| (CTG)n | Simple_repeat | 1.7 | 0.0 | 3.3 | 0.5 | 4.1 | 0.5 |
| (GA)n | Simple_repeat | 1.4 | 5.2 | 1.3 | 0.0 | 1.6 | 5.9 |
| (GAGAA)n | Simple_repeat | 4.0 | 0.6 | 2.2 | 0.0 | 2.1 | 0.0 |
| (GGA)n | Simple_repeat | 1.8 | 0.0 | 1.4 | 0.0 | -1.2 | 0.0 |
| (T)n | Simple_repeat | 1.8 | 3.6 | 1.9 | 3.7 | 1.7 | 3.2 |
| (TA)n | Simple_repeat | -1.3 | 0.0 | -1.4 | 0.0 | 1.0 | 0.0 |
| (TC)n | Simple_repeat | 1.2 | 0.0 | 1.1 | 0.0 | 1.3 | 0.0 |
| (TCC)n | Simple_repeat | 1.2 | 0.0 | 1.2 | 0.0 | -1.2 | 0.0 |
| (TCCCC)n | Simple_repeat | 1.3 | 0.0 | 2.3 | 0.0 | 2.3 | 0.0 |
| (TG)n | Simple_repeat | 1.0 | 0.0 | 1.1 | 0.0 | 1.2 | 0.0 |
| (TGG)n | Simple_repeat | 3.0 | 1.0 | 2.8 | 1.0 | 1.8 | 0.0 |
| (TGGGGG)n | Simple_repeat | 2.4 | 0.0 | 2.1 | 0.0 | 1.6 | 0.0 |
| (TTTA)n | Simple_repeat | 1.4 | 0.0 | 1.4 | 0.0 | -1.1 | 0.0 |
| (TTTTC)n | Simple_repeat | 1.1 | 0.0 | 1.2 | 0.0 | -1.8 | 0.0 |
| B1_Mm | SINE | -1.2 | 0.0 | 1.3 | 0.0 | -1.2 | 0.0 |
| B1_Mur3 | SINE | 1.1 | 0.0 | 1.1 | 0.0 | -1.3 | 0.0 |
| B1_Mur4 | SINE | -1.1 | 0.0 | 1.1 | 0.0 | -1.0 | 0.0 |
| B1_Mus1 | SINE | 1.1 | 0.0 | -1.1 | 0.0 | -1.4 | 0.0 |
| B1_Mus2 | SINE | 1.1 | 0.0 | -1.1 | 0.0 | -1.2 | 0.0 |
| B1F | SINE | -1.2 | 0.0 | 1.1 | 0.0 | 1.0 | 0.0 |
| B1F1 | SINE | -1.7 | 0.0 | -1.1 | 0.0 | -1.7 | 0.0 |
| B2_Mm2 | SINE | -1.1 | 0.0 | -1.3 | 0.0 | -1.1 | 0.0 |
| B3 | SINE | -1.4 | 93.2 | -1.0 | 0.0 | -1.1 | 0.0 |
| B3A | SINE | -1.1 | 0.0 | -1.0 | 0.0 | -1.2 | 0.0 |
| B4A | SINE | -1.2 | 0.0 | -1.3 | 0.0 | -1.0 | 0.0 |
| ID | SINE | -1.3 | 0.0 | -1.1 | 0.0 | -1.2 | 0.0 |
| ID_B1 | SINE | -1.1 | 0.0 | 1.3 | 0.0 | 1.0 | 0.0 |
| ID4 | SINE | 1.7 | 2.8 | 1.0 | 0.0 | -1.1 | 0.0 |
| ID4_b | SINE | -1.3 | 0.0 | -1.2 | 0.0 | -1.6 | 0.0 |
| MamSINE1 | SINE | -3.9 | 0.0 | -4.0 | 0.0 | 3.8 | 0.0 |
| MIR | SINE | 1.3 | 0.0 | -1.1 | 0.0 | 1.2 | 0.0 |
| MIR3 | SINE | -1.1 | 0.0 | 1.5 | 0.0 | -1.7 | 0.0 |
| MIRb | SINE | 1.0 | 0.0 | -1.2 | 0.0 | -1.4 | 0.0 |
| MIRc | SINE | 1.1 | 0.0 | 1.2 | 0.0 | 1.4 | 0.0 |
| MIRm | SINE | 1.3 | 0.0 | 2.2 | 1.1 | 2.5 | 0.0 |
| PB1 | SINE | 1.0 | 0.0 | 1.3 | 0.0 | -1.8 | 0.0 |
| PB1D10 | SINE | -1.2 | 0.0 | -1.0 | 0.0 | -1.1 | 0.0 |
| PB1D7 | SINE | -1.2 | 0.0 | 1.2 | 0.0 | 1.2 | 0.0 |
| PB1D9 | SINE | -1.1 | 0.0 | -1.3 | 0.0 | -1.4 | 0.0 |
| RSINE1 | SINE | -1.2 | 0.0 | -1.2 | 0.0 | -1.4 | 0.0 |
| tRNA-Ala-GCA | tRNA | 1.2 | 0.0 | -7.6 | 0.0 | -5.8 | 0.0 |
| tRNA-Ala-GCY | tRNA | -2.1 | 0.0 | 2.0 | 0.0 | -1.2 | 0.0 |

| **chrX-moderate** | Type | d0 odds ratio | % d0 sites | d7 odds ratio | % of d7 sites | MEF odds ratio | % of MEF sites |
| --- | --- | --- | --- | --- | --- | --- | --- |
| non-Repeat | . | -1.4 | 96.4 | -1.3 | 95.8 | -1.2 | 0.0 |
| MER5B | DNA | -1.1 | 0.0 | 1.9 | 0.9 | 1.3 | 0.0 |
| Tigger5 | DNA | -1.3 | 0.0 | -1.1 | 0.0 | 3.0 | 0.4 |
| HAL1-3A_ME | LINE | 1.5 | 0.0 | 1.2 | 0.0 | 3.1 | 0.7 |
| L1_Mm | LINE | -1.4 | 0.0 | -2.0 | 98.7 | -1.9 | 98.7 |
| L1_Mur1 | LINE | -1.1 | 0.0 | -2.8 | 99.6 | -1.4 | 0.0 |
| L1_Mur2 | LINE | -1.1 | 0.0 | -2.0 | 98.8 | -1.3 | 0.0 |
| L1_Mur3 | LINE | -1.1 | 0.0 | -1.6 | 98.1 | 1.1 | 0.0 |
| L1_Mus3 | LINE | -1.4 | 0.0 | -1.9 | 97.8 | -1.9 | 97.9 |
| L1MC1 | LINE | -1.5 | 0.0 | 1.1 | 0.0 | 3.3 | 0.6 |
| L1Md_A | LINE | -1.5 | 0.0 | -2.8 | 98.6 | -3.1 | 99.0 |
| L1Md_F | LINE | -1.4 | 0.0 | -2.0 | 99.2 | -1.1 | 0.0 |
| L1Md_F2 | LINE | 1.1 | 0.0 | -1.5 | 91.7 | -1.7 | 93.1 |
| L1Md_T | LINE | -1.1 | 0.0 | -3.4 | 98.5 | -2.6 | 98.2 |
| L1MD1 | LINE | 3.6 | 0.3 | -1.5 | 0.0 | 1.5 | 0.0 |
| L1ME4a | LINE | 1.0 | 0.0 | 2.1 | 0.3 | -1.8 | 0.0 |
| L1VL1 | LINE | -3.6 | 0.0 | -2.6 | 99.8 | -1.0 | 0.0 |
| L1VL2 | LINE | -1.9 | 0.0 | -2.1 | 99.6 | -2.3 | 0.0 |
| L1VL4 | LINE | -1.1 | 0.0 | -1.8 | 99.3 | -1.9 | 0.0 |
| L2a | LINE | -1.4 | 0.0 | 1.5 | 2.8 | 1.4 | 0.0 |
| L2b | LINE | -1.4 | 0.0 | 1.7 | 1.2 | 1.3 | 0.0 |
| AT-rich | Low_complexity | 1.1 | 0.0 | -1.2 | 87.0 | 1.3 | 15.3 |
| C-rich | Low_complexity | 7.8 | 1.4 | 4.0 | 0.7 | 4.8 | 0.8 |
| CT-rich | Low_complexity | 1.5 | 3.2 | 1.7 | 3.3 | 1.1 | 0.0 |
| G-rich | Low_complexity | 10.4 | 1.2 | 4.2 | 0.6 | 4.0 | 0.4 |
| GA-rich | Low_complexity | 1.8 | 3.5 | 1.8 | 3.5 | 1.6 | 1.8 |
| GC-rich | Low_complexity | 13.9 | 2.1 | 9.9 | 1.7 | 17.5 | 2.1 |
| polypyrimidine | Low_complexity | 3.3 | 0.3 | 1.3 | 0.0 | 2.9 | 0.0 |
| T-rich | Low_complexity | 1.4 | 0.0 | 1.1 | 0.0 | 1.6 | 0.0 |
| ETnERV2-int | LTR | -5.0 | 99.8 | -3.1 | 99.7 | -4.2 | 0.0 |
| ETnERV3-int | LTR | -2.3 | 0.0 | -174.2 | 100.0 | -46.8 | 0.0 |
| IAPEz-int | LTR | -3.1 | 0.0 | -7.6 | 99.9 | -132.8 | 100.0 |
| MER89 | LTR | 1.9 | 0.0 | 5.1 | 0.1 | -4.3 | 0.0 |
| MMETn-int | LTR | -2.4 | 0.0 | -17.6 | 100.0 | -1.7 | 0.0 |
| MTB_Mm-int | LTR | -4.4 | 0.0 | 6.9 | 0.1 | -3.4 | 0.0 |
| RLTR16 | LTR | 4.5 | 0.2 | 1.3 | 0.0 | 1.1 | 0.0 |
| RLTR26 | LTR | -1.7 | 0.0 | 1.1 | 0.0 | 3.3 | 0.7 |
| RMER21B | LTR | 4.1 | 0.2 | 1.9 | 0.0 | 1.3 | 0.0 |
| RMER1C | Other | -1.6 | 0.0 | -3.2 | 99.7 | -2.0 | 0.0 |
| 5S | rRNA | -13.2 | 0.0 | 3.3 | 0.2 | -9.3 | 0.0 |
| (A)n | Simple_repeat | 1.6 | 2.4 | 1.3 | 0.0 | 1.6 | 0.0 |
| (ATG)n | Simple_repeat | 3.0 | 0.4 | -1.1 | 0.0 | -1.5 | 0.0 |
| (CA)n | Simple_repeat | 1.2 | 0.0 | 1.3 | 9.2 | 1.3 | 0.0 |
| (CACCC)n | Simple_repeat | 3.5 | 0.0 | 3.8 | 0.2 | 4.0 | 0.0 |
| (CAG)n | Simple_repeat | 3.6 | 0.4 | 3.2 | 0.4 | -1.2 | 0.0 |
| (CAT)n | Simple_repeat | 1.4 | 0.0 | 2.4 | 0.3 | -1.2 | 0.0 |
| (CCA)n | Simple_repeat | 1.2 | 0.0 | 1.6 | 0.0 | 2.6 | 0.6 |
| (CCAA)n | Simple_repeat | 1.9 | 0.0 | 2.7 | 0.3 | 1.8 | 0.0 |
| (CCCCCA)n | Simple_repeat | 1.2 | 0.0 | -1.0 | 0.0 | -6.2 | 0.0 |
| (CCCCCT)n | Simple_repeat | 1.8 | 0.0 | 5.1 | 0.2 | 2.7 | 0.0 |
| (CCCCG)n | Simple_repeat | 10.7 | 0.2 | 8.1 | 0.1 | 8.4 | 0.2 |
| (CCG)n | Simple_repeat | 11.4 | 0.6 | 12.0 | 0.6 | 18.5 | 0.8 |
| (CG)n | Simple_repeat | 6.5 | 0.3 | 4.5 | 0.2 | 8.4 | 0.3 |
| (CGG)n | Simple_repeat | 13.3 | 0.5 | 13.3 | 0.5 | 17.8 | 0.6 |
| (CGGGG)n | Simple_repeat | 12.4 | 0.3 | 10.7 | 0.2 | 12.8 | 0.3 |
| (CGTG)n | Simple_repeat | -5.1 | 0.0 | 7.1 | 0.2 | 2.6 | 0.0 |
| (CTG)n | Simple_repeat | 2.2 | 0.0 | 4.6 | 0.4 | 4.0 | 0.4 |
| (GA)n | Simple_repeat | 1.4 | 4.1 | 1.6 | 4.7 | 1.5 | 0.0 |
| (GAGAA)n | Simple_repeat | -1.7 | 0.0 | -1.3 | 0.0 | 2.6 | 0.0 |
| (GGA)n | Simple_repeat | 1.7 | 0.0 | 2.6 | 0.7 | 2.7 | 0.7 |
| (T)n | Simple_repeat | 1.7 | 2.7 | 1.4 | 2.2 | 1.3 | 0.0 |
| (TA)n | Simple_repeat | -1.0 | 0.0 | -1.6 | 96.9 | -1.2 | 0.0 |
| (TC)n | Simple_repeat | 1.5 | 4.5 | 1.6 | 5.1 | 1.3 | 0.0 |
| (TCC)n | Simple_repeat | 1.6 | 0.0 | 2.4 | 0.7 | 3.0 | 0.7 |
| (TCCCC)n | Simple_repeat | 1.4 | 0.0 | 3.7 | 0.1 | 2.2 | 0.0 |
| (TG)n | Simple_repeat | 1.2 | 8.7 | 1.4 | 9.8 | 1.1 | 0.0 |
| (TGG)n | Simple_repeat | 1.7 | 0.0 | 1.6 | 0.0 | -1.2 | 0.0 |
| (TGGGGG)n | Simple_repeat | 2.4 | 0.0 | 3.5 | 0.1 | 1.9 | 0.0 |
| (TTTA)n | Simple_repeat | 2.0 | 1.8 | -1.1 | 0.0 | 1.5 | 0.0 |
| (TTTTC)n | Simple_repeat | -2.2 | 0.0 | 2.2 | 0.6 | 1.3 | 0.0 |
| B1_Mm | SINE | -1.1 | 0.0 | 1.3 | 3.4 | 1.1 | 0.0 |
| B1_Mur3 | SINE | -1.1 | 0.0 | 1.5 | 2.0 | 1.2 | 0.0 |
| B1_Mur4 | SINE | -1.1 | 0.0 | 1.6 | 3.3 | -1.2 | 0.0 |
| B1_Mus1 | SINE | -1.0 | 0.0 | 1.4 | 7.6 | 1.2 | 0.0 |
| B1_Mus2 | SINE | 1.0 | 0.0 | 1.4 | 5.4 | -1.0 | 0.0 |
| B1F | SINE | 1.1 | 0.0 | 1.4 | 4.6 | -1.1 | 0.0 |
| B1F1 | SINE | -1.6 | 0.0 | 1.4 | 2.0 | 1.0 | 0.0 |
| B2_Mm2 | SINE | 1.2 | 0.0 | 1.3 | 5.3 | 1.2 | 0.0 |
| B3 | SINE | -1.0 | 0.0 | 1.3 | 10.1 | 1.2 | 0.0 |
| B3A | SINE | -1.0 | 0.0 | 1.3 | 5.7 | 1.1 | 0.0 |
| B4A | SINE | -1.7 | 97.3 | 1.3 | 5.4 | -1.0 | 0.0 |
| ID | SINE | -1.5 | 0.0 | 1.7 | 0.9 | -1.9 | 0.0 |
| ID_B1 | SINE | -1.0 | 0.0 | 1.4 | 8.1 | -1.1 | 0.0 |
| ID4 | SINE | -1.4 | 0.0 | 1.3 | 2.2 | 1.4 | 0.0 |
| ID4_b | SINE | 1.0 | 0.0 | 1.4 | 2.8 | 1.1 | 0.0 |
| MamSINE1 | SINE | -11.8 | 0.0 | 2.6 | 0.2 | -8.9 | 0.0 |
| MIR | SINE | 1.3 | 0.0 | 1.5 | 4.4 | 1.2 | 0.0 |
| MIR3 | SINE | 1.4 | 0.0 | 2.1 | 1.7 | 1.3 | 0.0 |
| MIRb | SINE | 1.1 | 0.0 | 1.7 | 4.4 | 1.5 | 3.3 |
| MIRc | SINE | 1.4 | 0.0 | 1.8 | 2.5 | 1.3 | 0.0 |
| MIRm | SINE | 1.5 | 0.0 | 1.8 | 0.8 | 1.2 | 0.0 |
| PB1 | SINE | -1.1 | 0.0 | 1.8 | 1.7 | -1.4 | 0.0 |
| PB1D10 | SINE | -1.1 | 0.0 | 1.5 | 5.8 | 1.3 | 0.0 |
| PB1D7 | SINE | 1.1 | 0.0 | 1.6 | 2.1 | 1.3 | 0.0 |
| PB1D9 | SINE | 1.2 | 0.0 | 1.6 | 2.4 | 1.1 | 0.0 |
| RSINE1 | SINE | -1.1 | 0.0 | 1.4 | 8.0 | 1.1 | 0.0 |
| tRNA-Ala-GCA | tRNA | -1.0 | 0.0 | 2.9 | 0.1 | 4.3 | 0.2 |
| tRNA-Ala-GCY | tRNA | -1.5 | 0.0 | 2.1 | 0.4 | 1.6 | 0.0 |
